# Supplementary material for: Platinum(IV)-Loaded Degraded Glycol Chitosan as Efficient Platinum(IV) Drug Delivery Platform
Source: MDPI journal article supplement (doi:10.3390/pharmaceutics15041050), 2023-03-24
Supplement: s1 [file s1]

*Supporting Information*

# **Platinum(IV) loaded degraded glycol chitosan as efficient platinum(IV) drug delivery platform**

**Yvonne Lerchbammer-Kreith <sup>1,†</sup>, Nadine S. Sommerfeld <sup>1,†</sup>, Klaudia Cseh <sup>1</sup>, Xian Weng-Jiang <sup>2</sup>, Uchechukwu Odunze <sup>2</sup>, Andreas G. Schätzlein <sup>2</sup>, Ijeoma F. Uchegbu <sup>2</sup>, Mathea S. Galanski <sup>1</sup>, Michael A. Jakupiec <sup>1,3,\*</sup> and Bernhard K. Keppler <sup>1,3</sup>**

<sup>1</sup> Institute of Inorganic Chemistry, Faculty of Chemistry, University of Vienna, Waehringer Strasse 42, 1090 Vienna, Austria

<sup>2</sup> School of Pharmacy, University College London, Brunswick Square 29-39, London WC1N 1AX, UK

<sup>3</sup> Research Cluster "Translational Cancer Therapy Research", University of Vienna, Waehringer Strasse 42, 1090 Vienna, Austria

\* Correspondence: michael.jakupiec@univie.ac.at

† These authors contributed equally to this work.

## Table of Contents

|                                               |    |
|-----------------------------------------------|----|
| 1. NMR spectra of platinum(IV) complexes..... | 2  |
| 2. NMR spectra of dGC polymers .....          | 8  |
| 3. NMR spectra of conjugates .....            | 9  |
| 4. Concentration-effect curves .....          | 13 |
| 5. Solubility data .....                      | 16 |

## 1. NMR spectra of platinum(IV) complexes

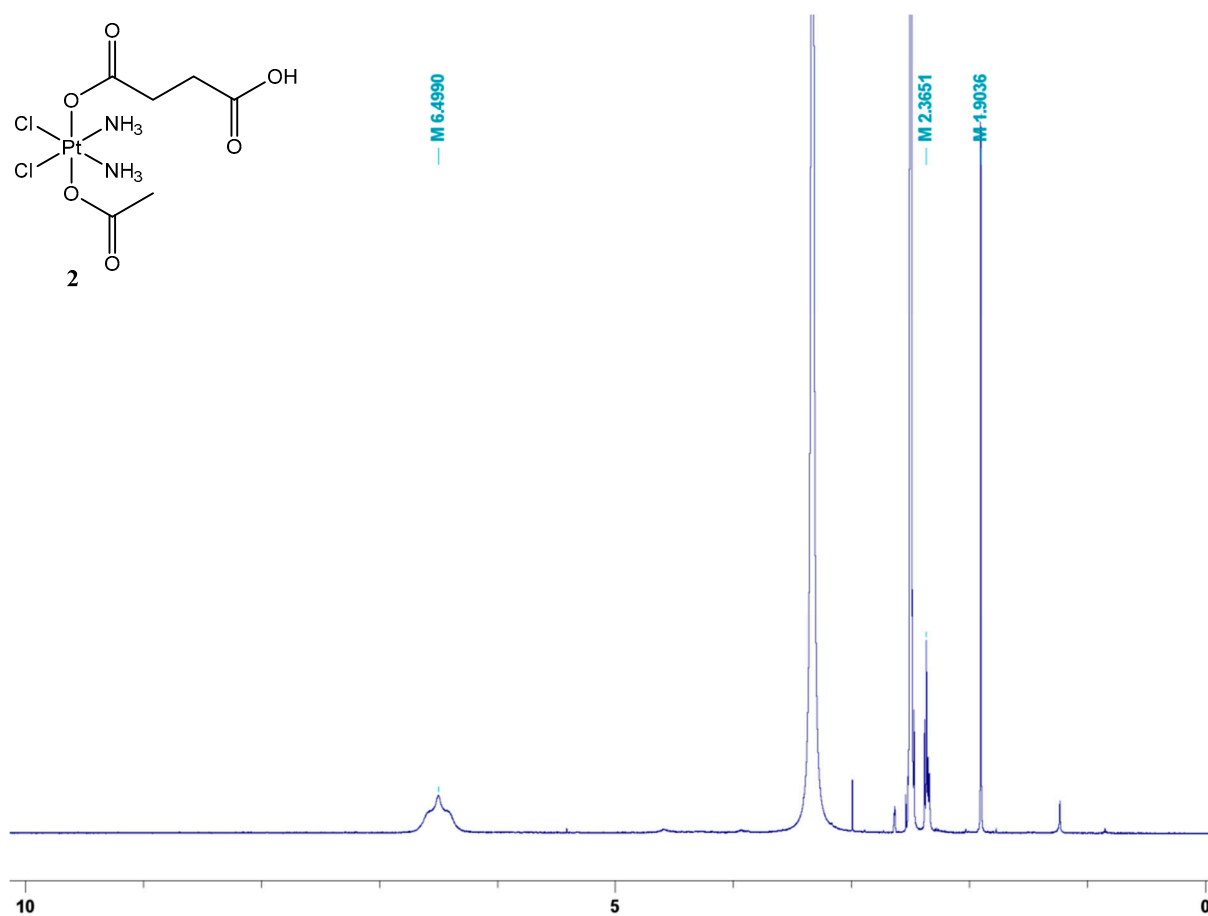

**Figure S1.**  $^1\text{H}$  NMR spectrum of complex **2** in  $\text{d}_6\text{-DMSO}$ .

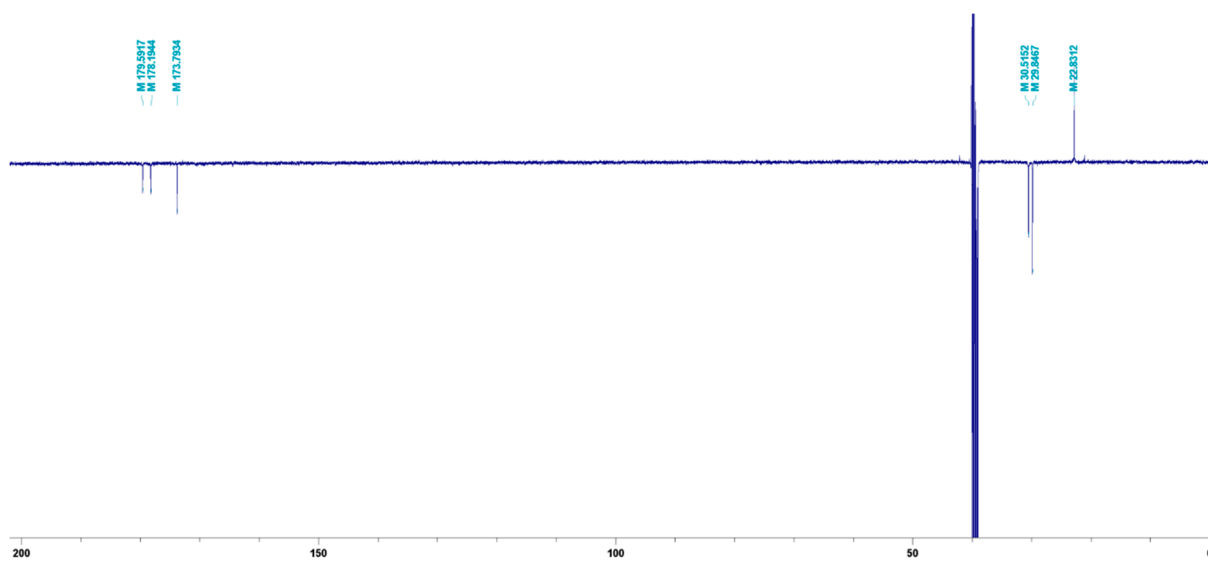

**Figure S2.**  $^{13}\text{C}$  NMR spectrum of complex **2** in  $\text{d}_6\text{-DMSO}$ .

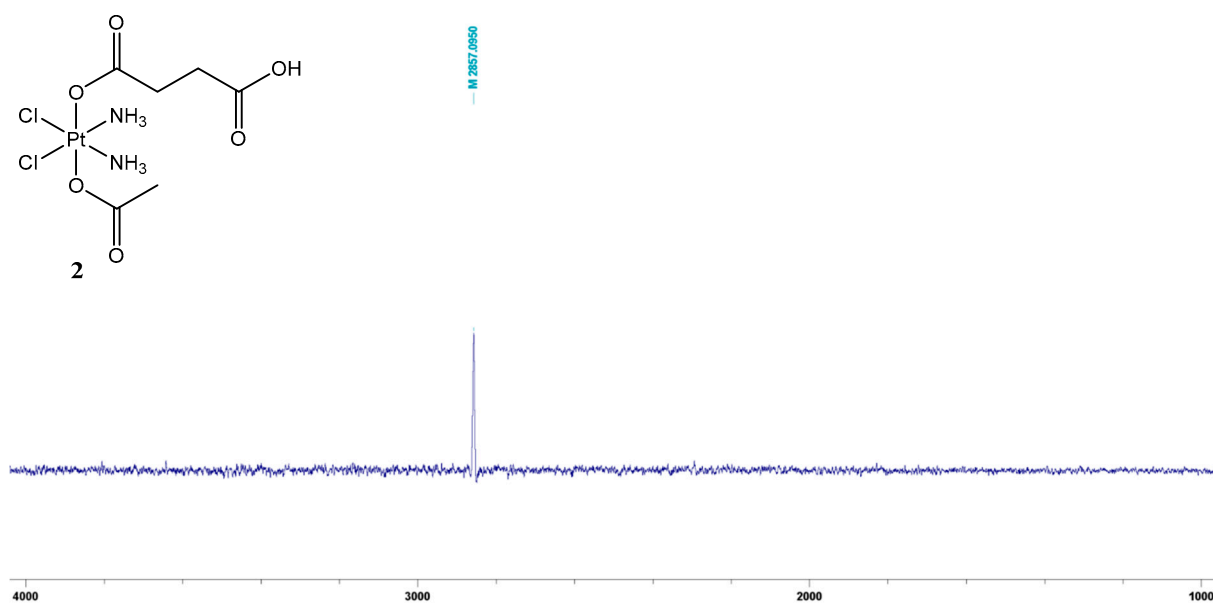

**Figure S3.** <sup>195</sup>Pt NMR spectrum of complex 2 in d<sub>6</sub>-DMSO.

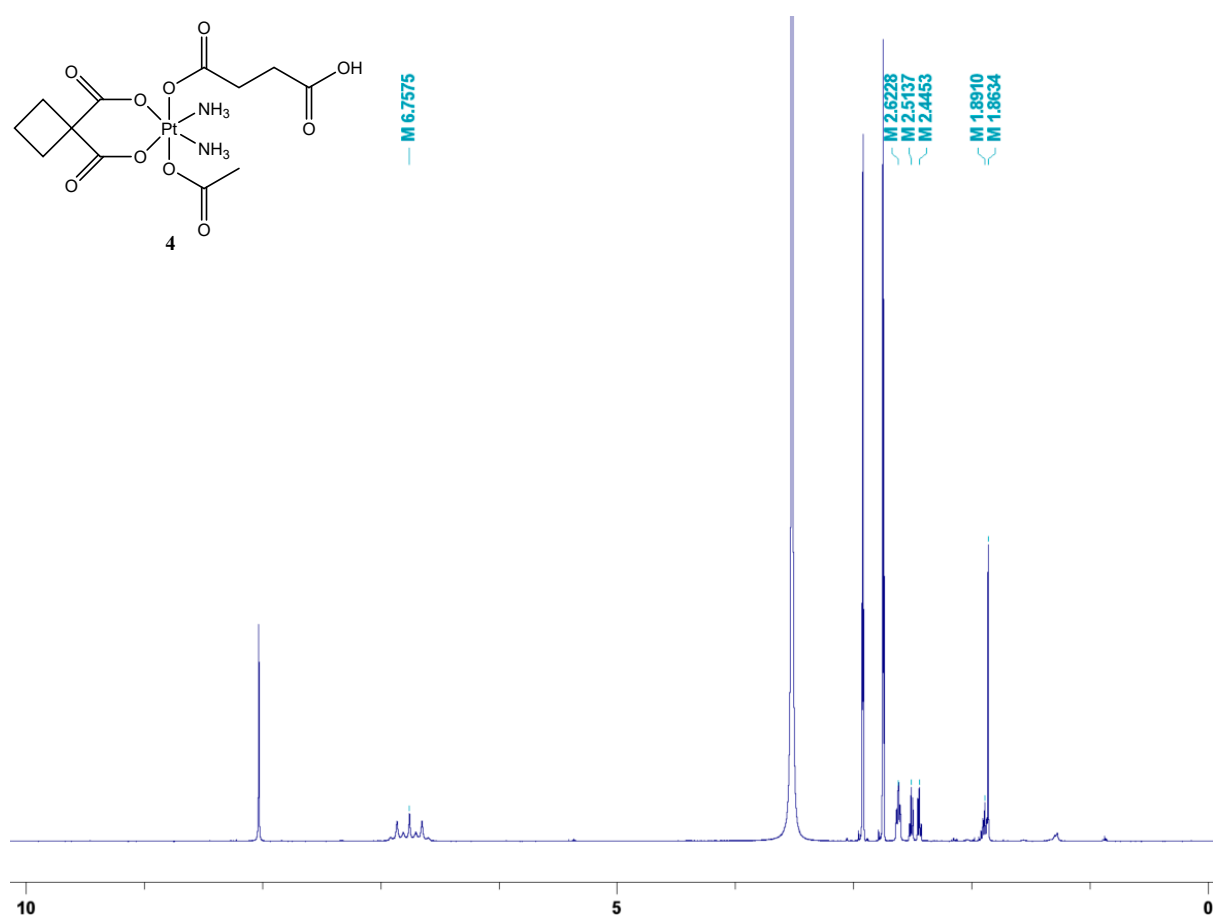

**Figure S4.** <sup>1</sup>H NMR spectrum of complex **4** in d<sub>7</sub>-DMF.

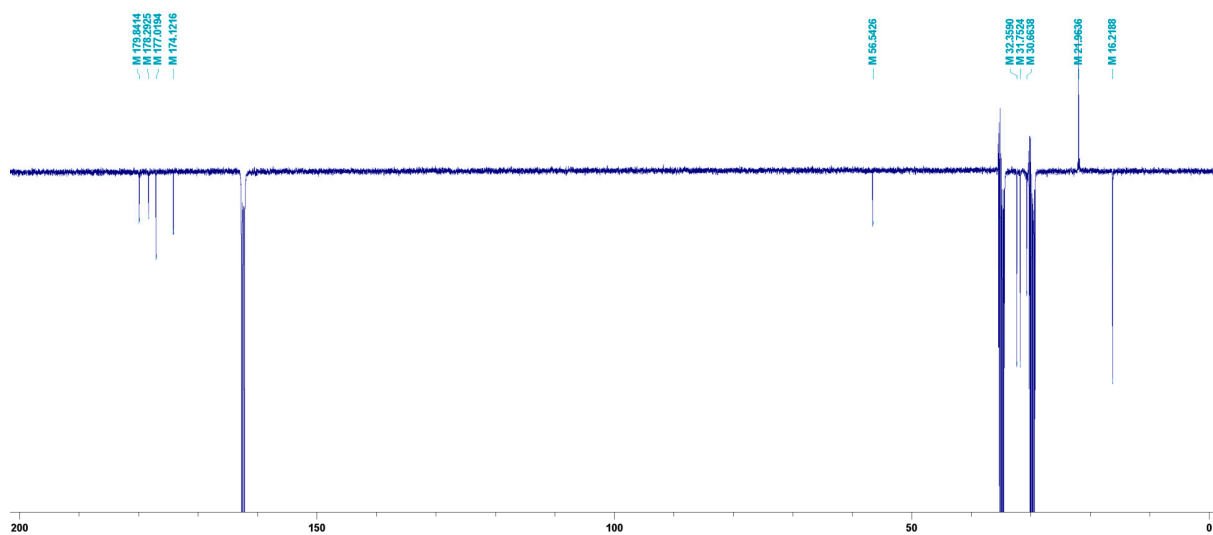

**Figure S5.** <sup>13</sup>C NMR spectrum of complex **4** in d<sub>7</sub>-DMF.

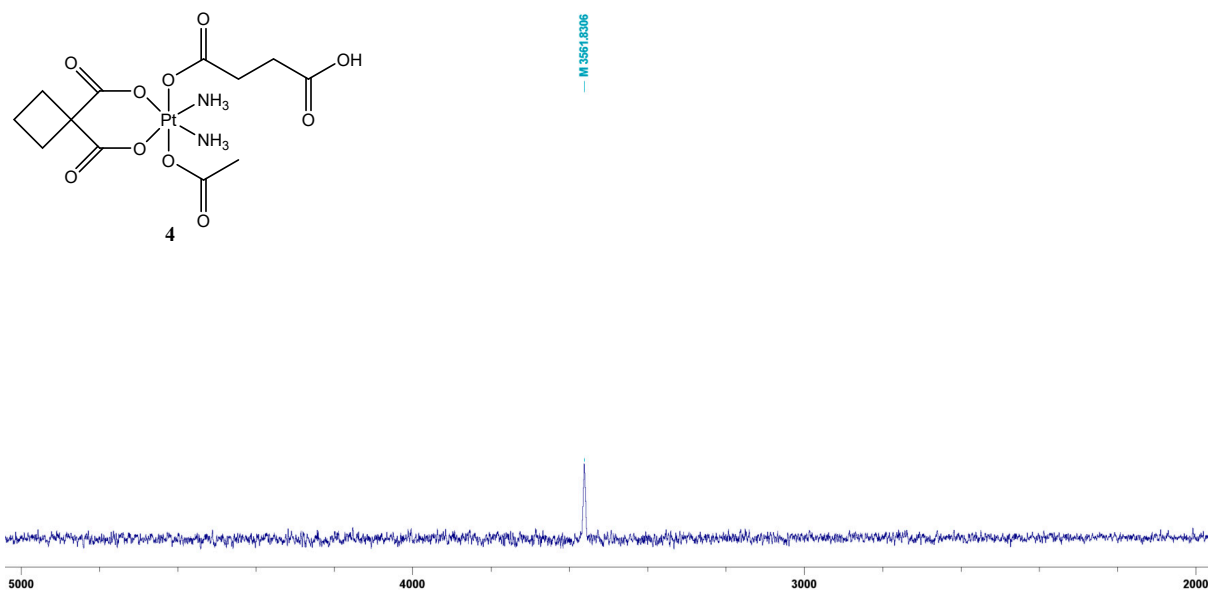

**Figure S6.**  $^{195}\text{Pt}$  NMR spectrum of complex **4** in  $\text{d}_7$ -DMF.

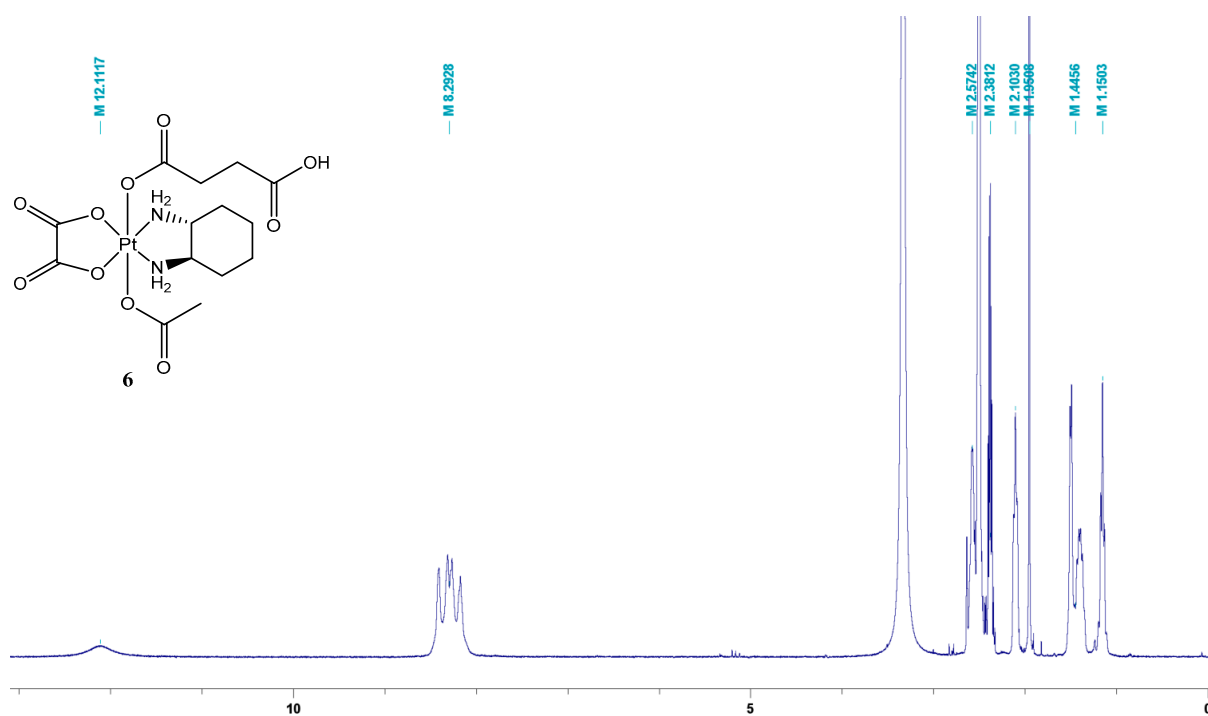

Figure S7. <sup>1</sup>H NMR spectrum of complex 6 in d<sub>6</sub>-DMSO.

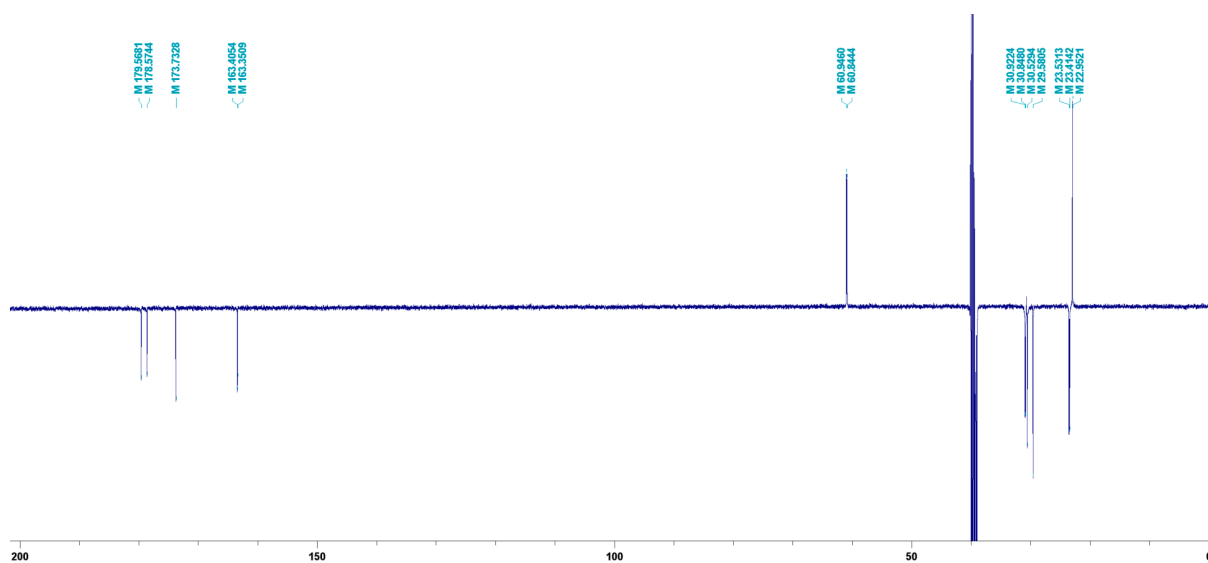

Figure S8. <sup>13</sup>C NMR spectrum of complex 6 in d<sub>6</sub>-DMSO.

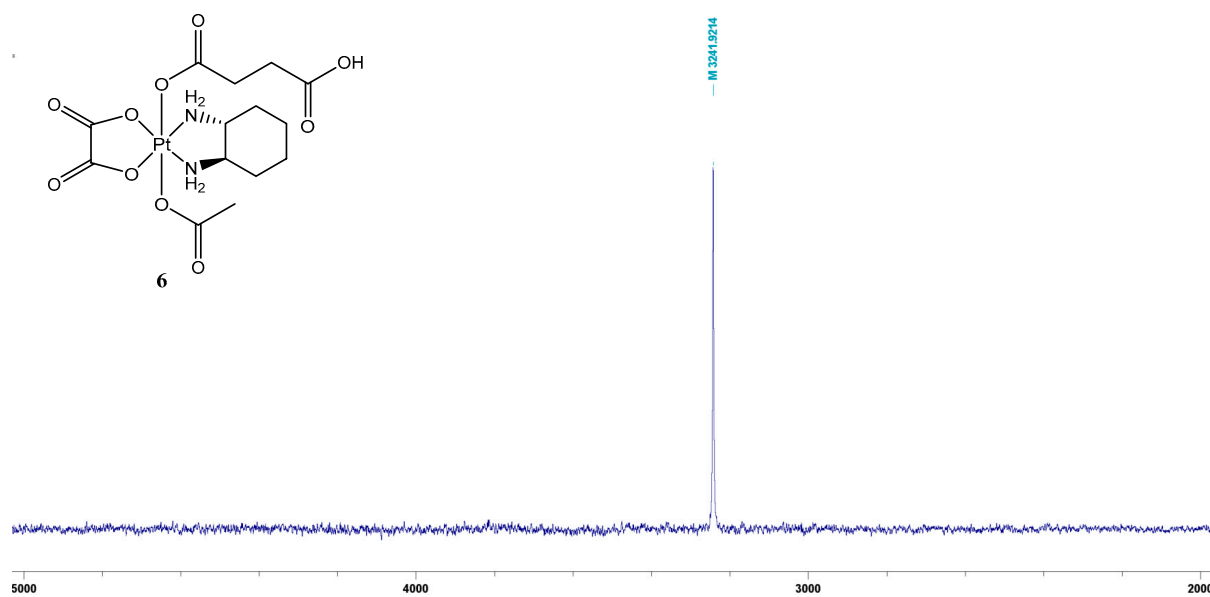

**Figure S9.**  $^{195}\text{Pt}$  NMR spectrum of complex **6** in  $\text{d}_6\text{-DMSO}$ .



## 2. NMR spectra of dGC polymers

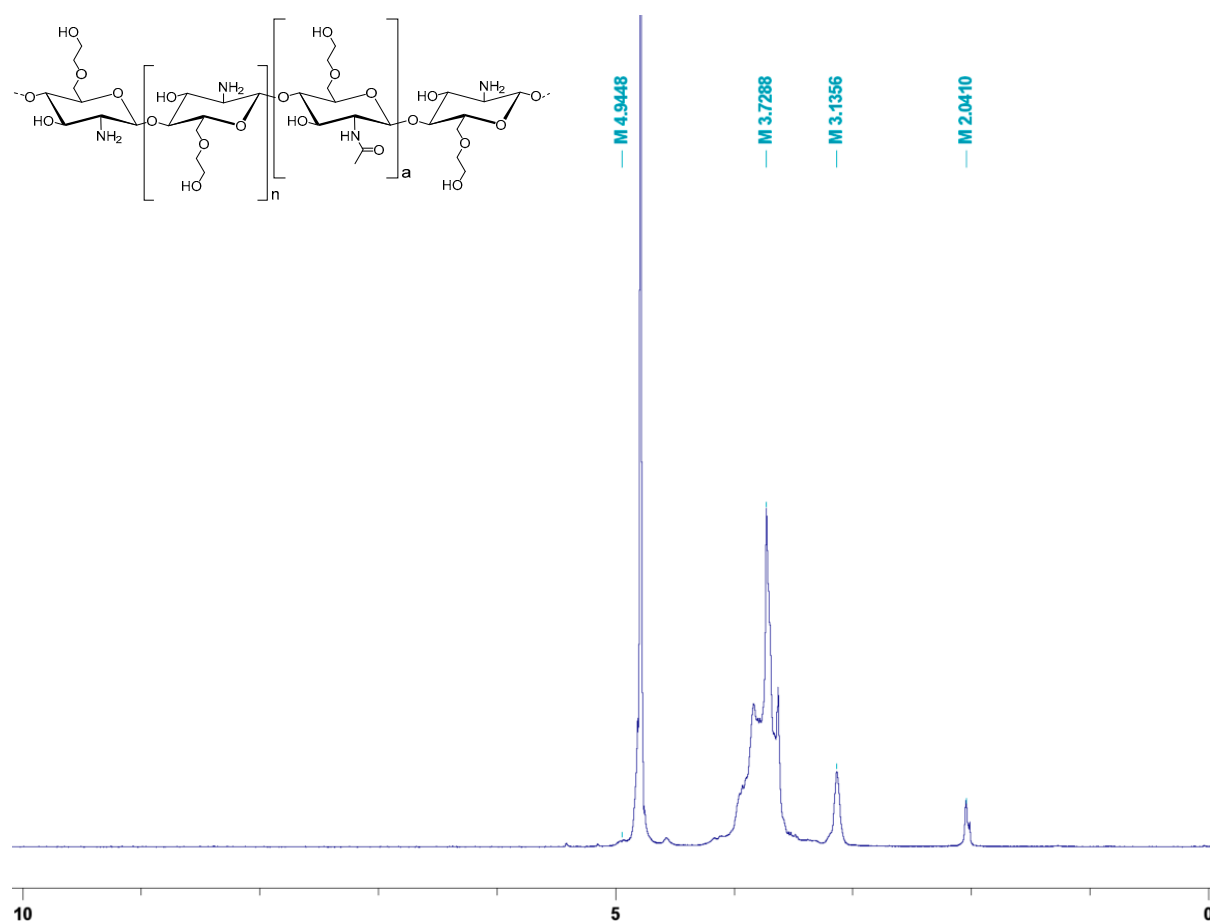

**Figure S10.**  $^1\text{H}$  NMR spectrum of dGC polymer P2 in  $\text{D}_2\text{O}$ .

### 3. NMR spectra of conjugates

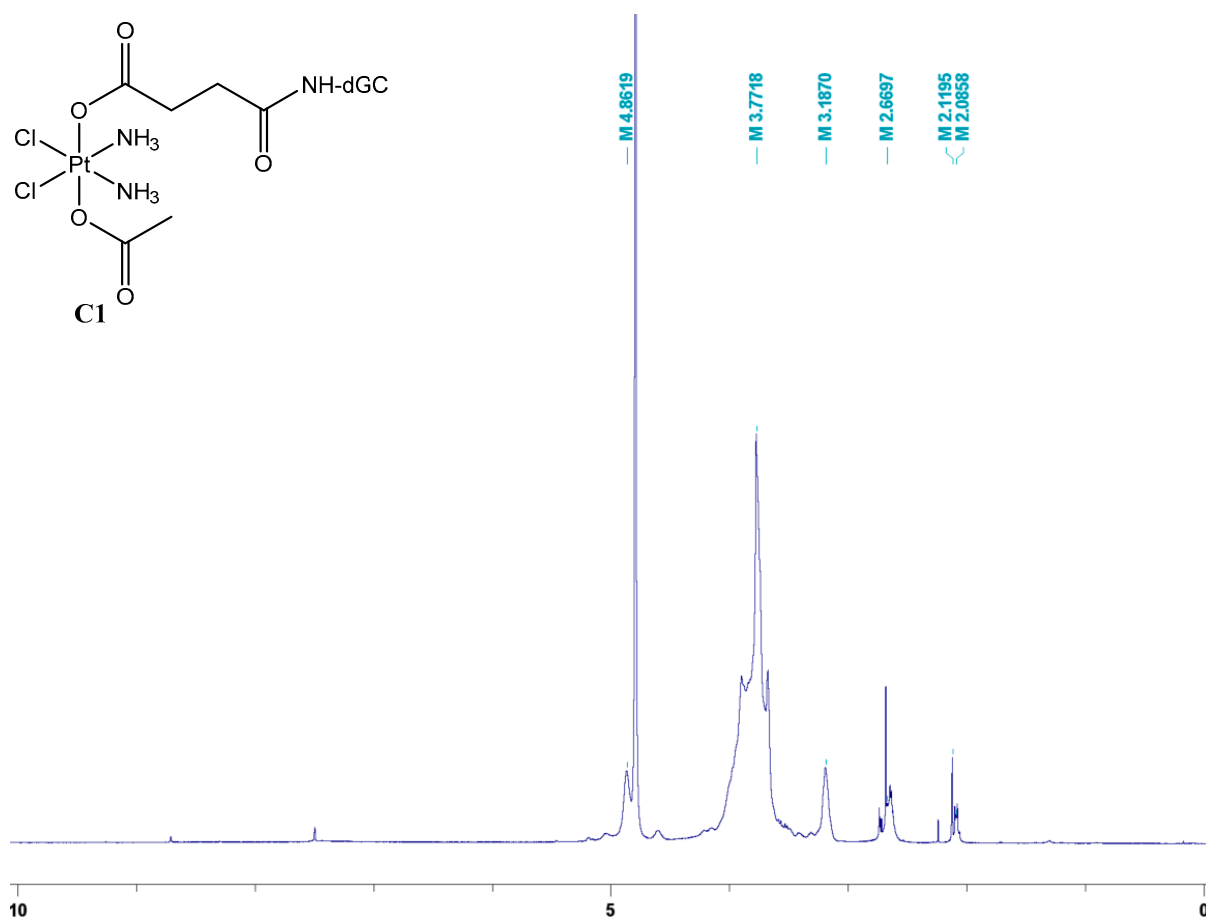

**Figure S11.** <sup>1</sup>H NMR spectrum of conjugate C1 in D<sub>2</sub>O.

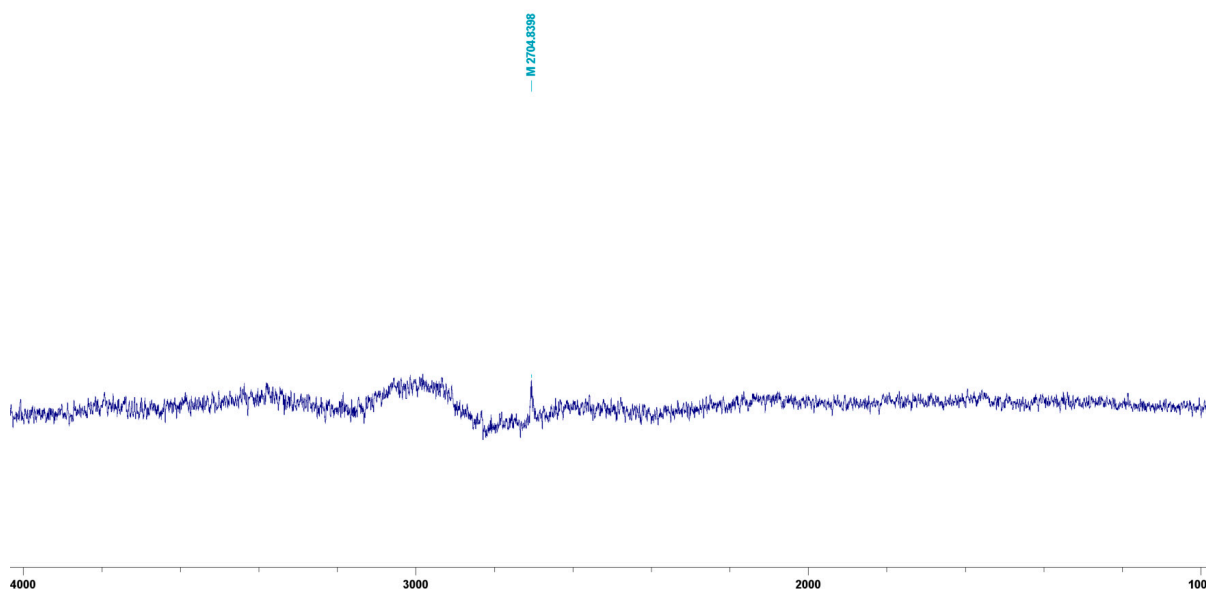

**Figure S12.** <sup>195</sup>Pt NMR spectrum of conjugate C1 in D<sub>2</sub>O.

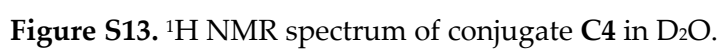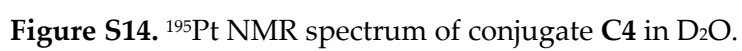

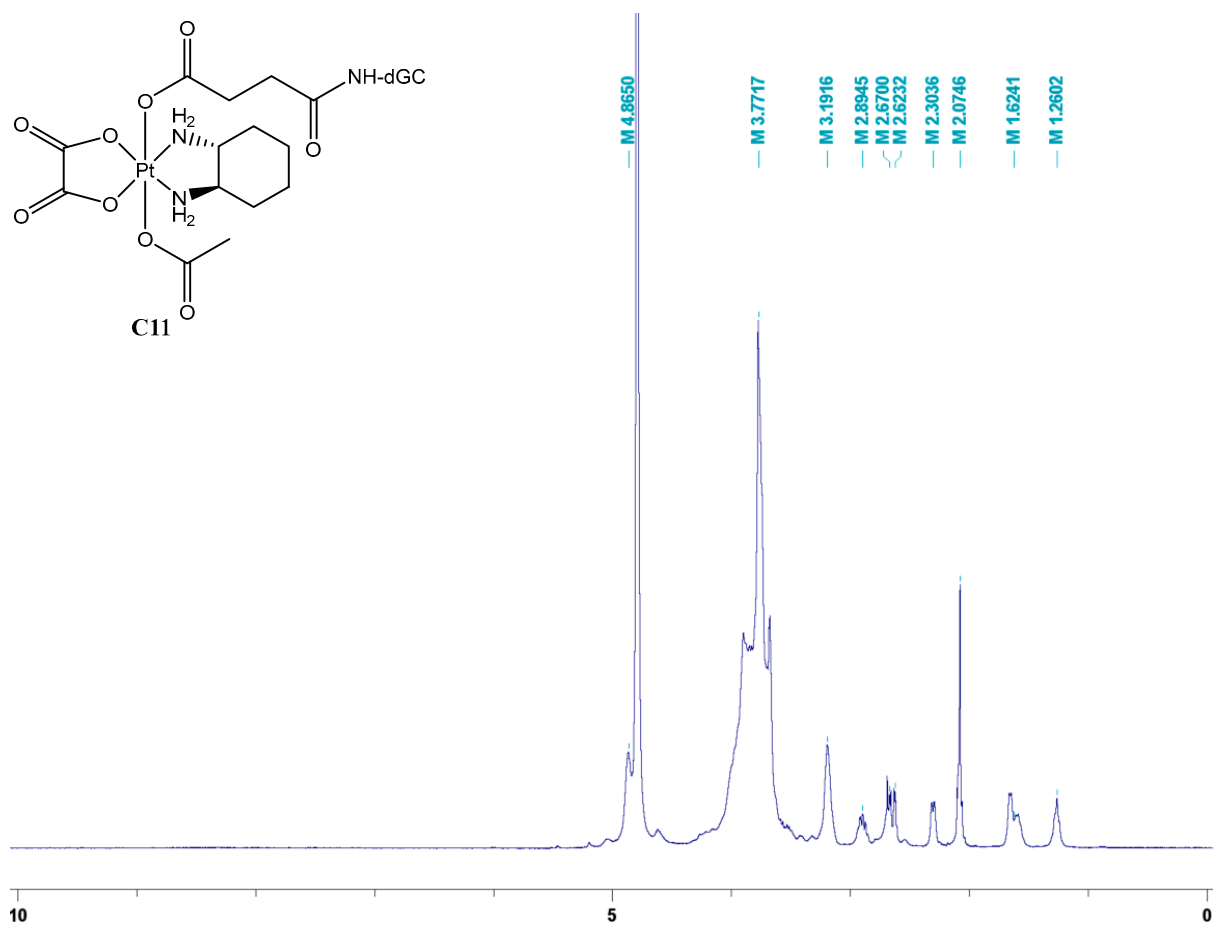

**Figure S15.** <sup>1</sup>H NMR spectrum of conjugate C11 in D<sub>2</sub>O.

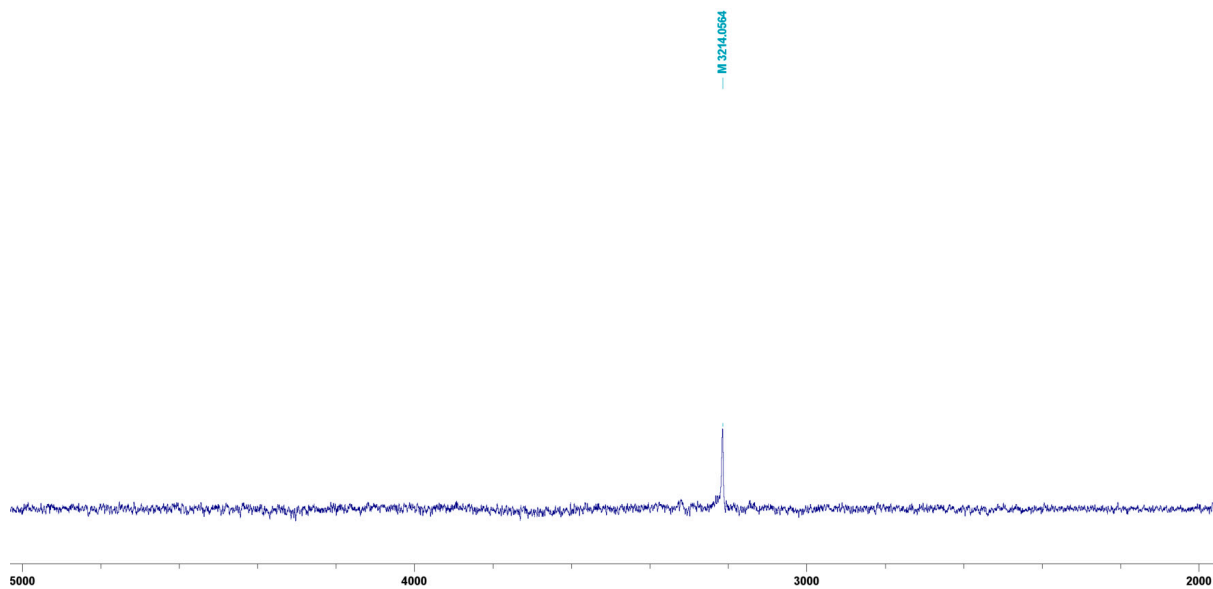

**Figure S16.** <sup>195</sup>Pt NMR spectrum of conjugate C11 in D<sub>2</sub>O.

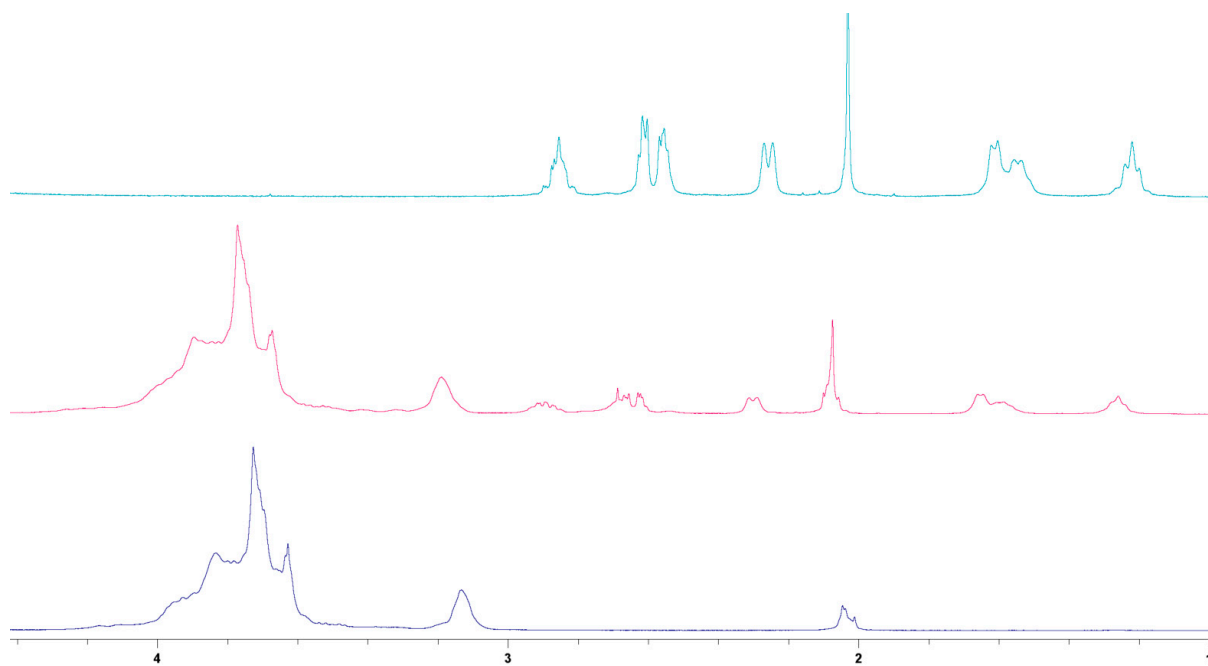

**Figure S17.**  $^1\text{H}$  NMR spectra measured in  $\text{D}_2\text{O}$  of platinum(IV) complex **6** (above), conjugate **C11** (middle) and dGC polymer **P2** (below).

#### 4. Concentration-effect curves

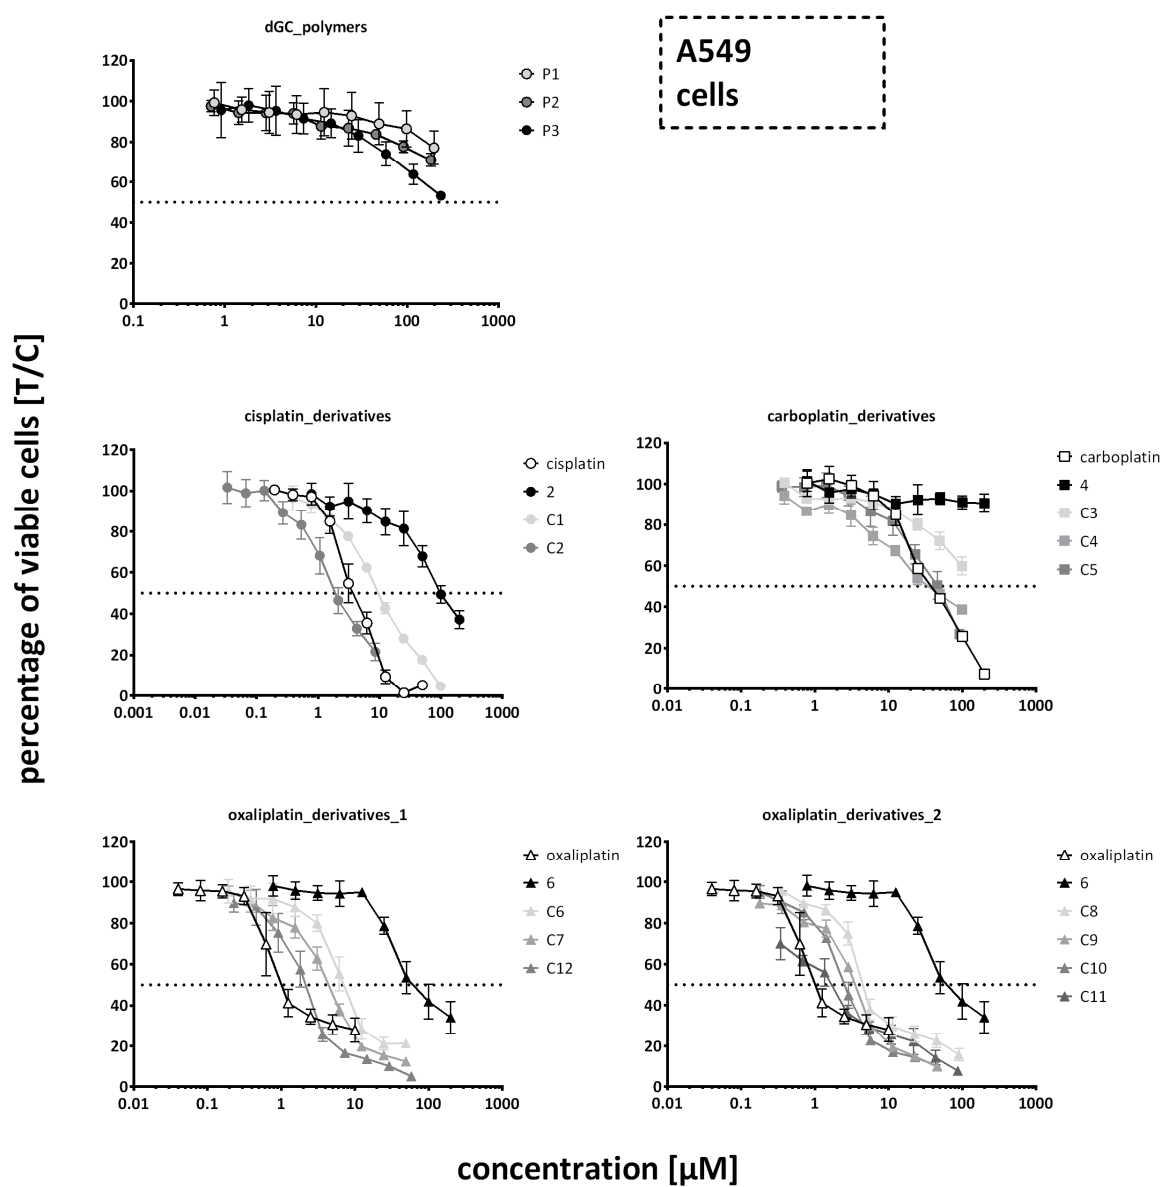

Figure S18. Concentration-effect curves in human cancer cell line A549 in MTT assays.

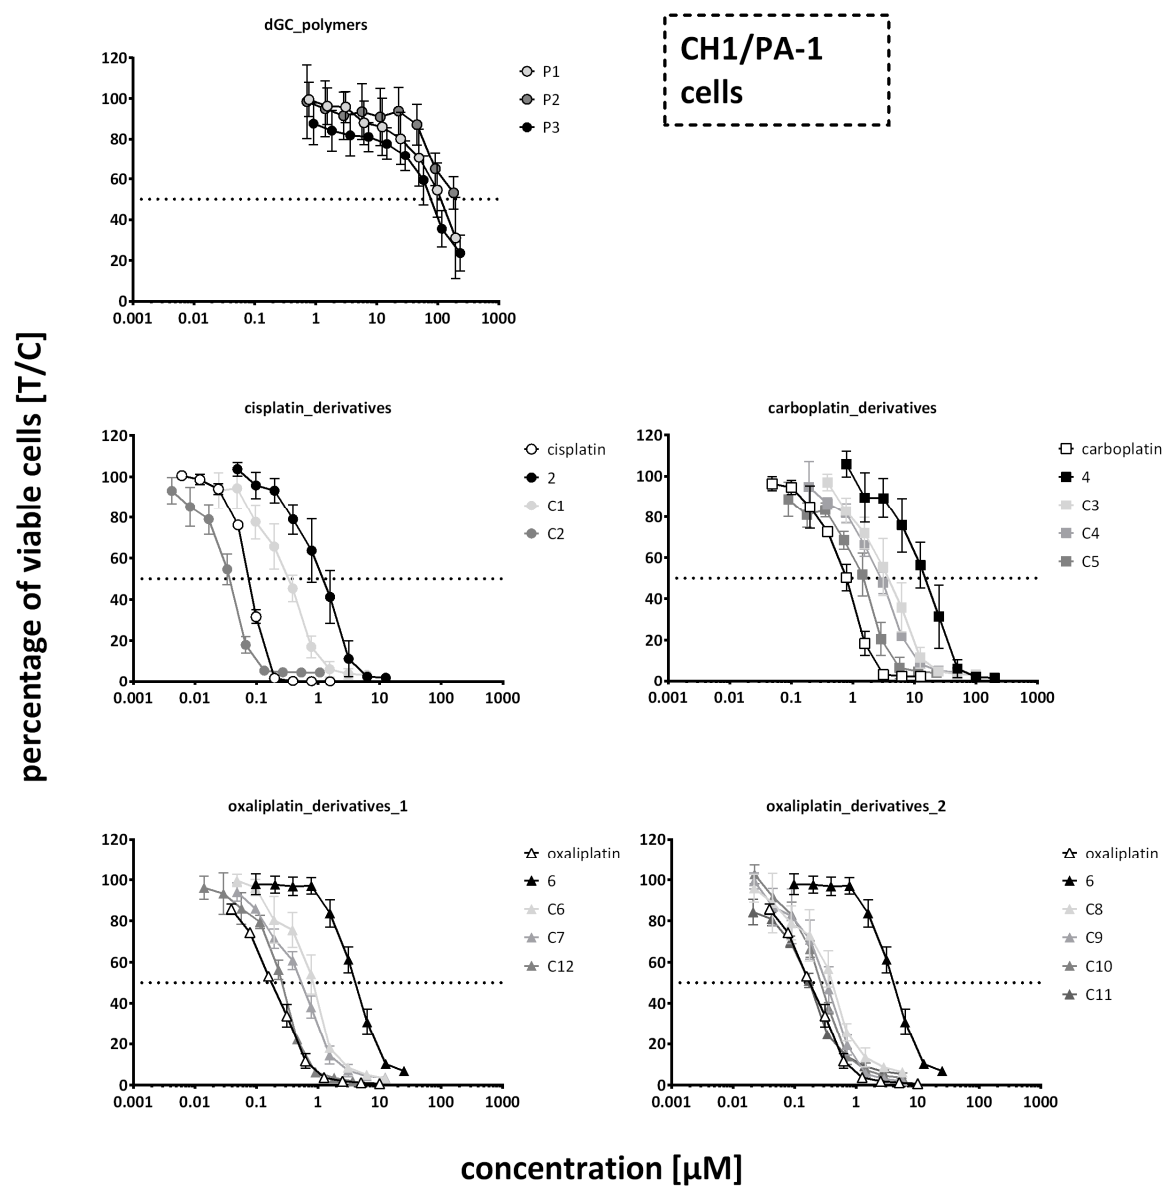

**Figure S19.** Concentration-effect curves in human cancer cell line CH1/PA-1 in MTT assays.

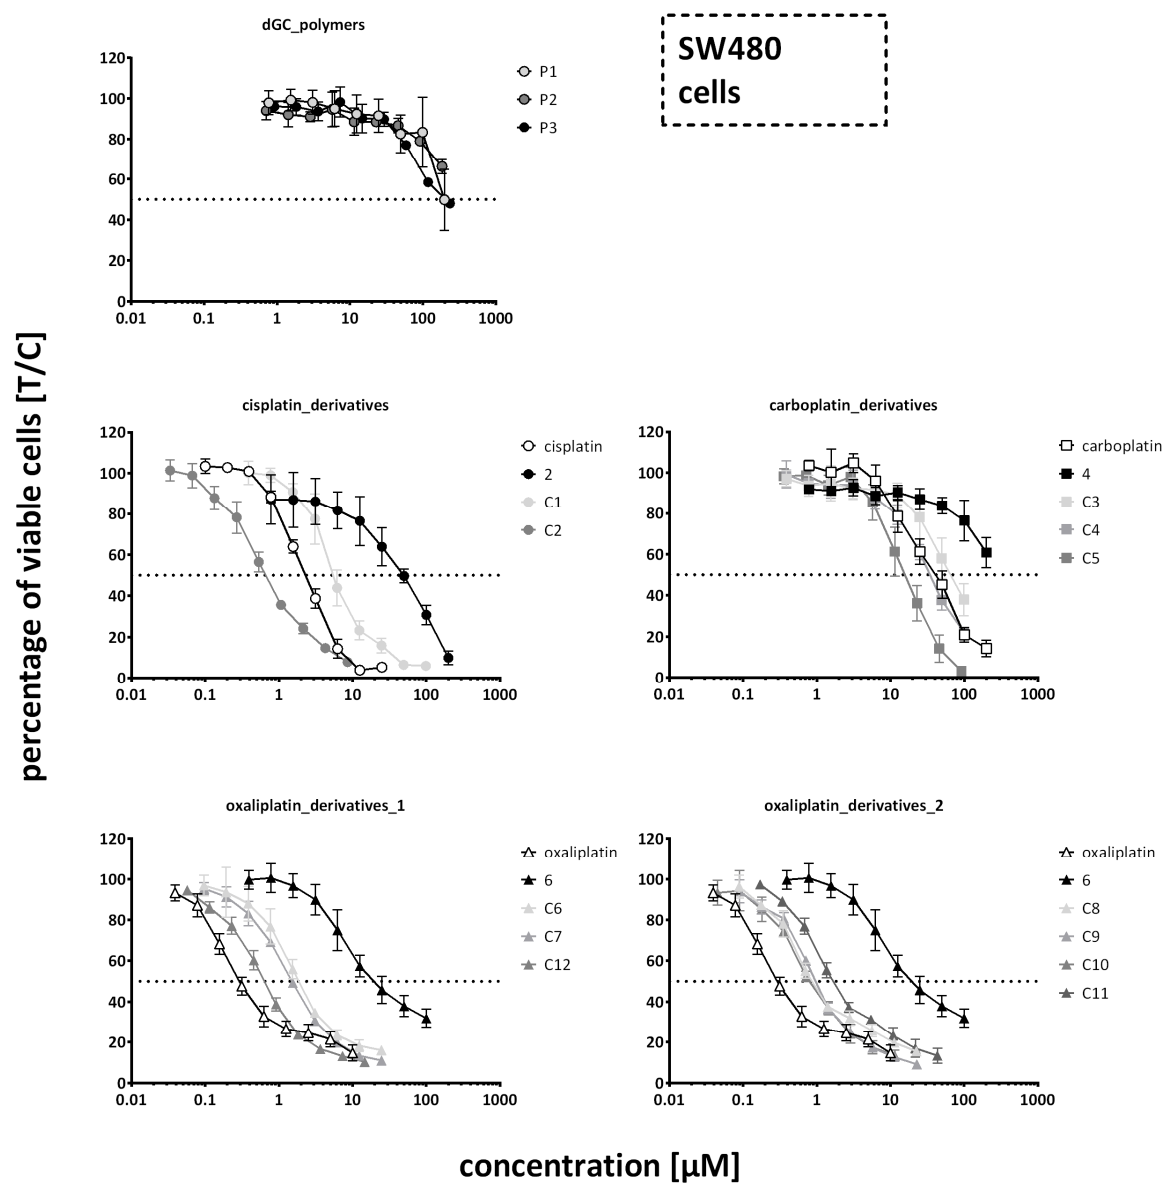

**Figure S20.** Concentration-effect curves in human cancer cell line SW480 in MTT assays.



## 5. Solubility data

**Table S1.** Overview of the water solubility of conjugates **C1-C12**, **S1-S5**, **V1-V3** measured by visual judgement in Milli-Q water at room temperature.

| Sample | Pt(IV) | dGC | Water solubility<br>[mg/mL] |
|--------|--------|-----|-----------------------------|
| C1     | 2      | P1  | >36                         |
| C2     | 2      | P2  | ~1                          |
| C3     | 4      | P1  | >39                         |
| C4     | 4      | P1  | ~14                         |
| C5     | 4      | P2  | ~7                          |
| C6     | 6      | P1  | >48                         |
| C7     | 6      | P1  | >38                         |
| C8     | 6      | P2  | >19                         |
| C9     | 6      | P2  | >22                         |
| C10    | 6      | P2  | >15                         |
| C11    | 6      | P2  | ~4                          |
| C12    | 6      | P3  | ~2                          |
| S1     | 2      | P3  | <0.5                        |
| S2     | 2      | P3  | <0.5                        |
| S3     | 4      | P3  | <0.5                        |
| S4     | 4      | P3  | <0.5                        |
| S5     | 6      | P3  | <0.5                        |
| V1     | 6      | P1  | >55                         |
| V2     | 6      | P2  | >21                         |
| V3     | 6      | P3  | ~9                          |
